# Supplementary material for: When Height Carries Weight: Communicating Hidden Object Properties for Joint Action
Source: PubMed Central journal article supplement — Cogn Sci. 2018 Jun 24;42(6):2021–59. doi: 10.1111/cogs.12638 (PMC6120543; doi:10.1111/cogs.12638), 2018-06-24

# Exp. 1: Trial-by-trial accuracy

Accuracy (1 = match, 0 = mismatch; y-axis) shown across trials (x-axis) per participant pair.

### EXP. 1: PAIR 1

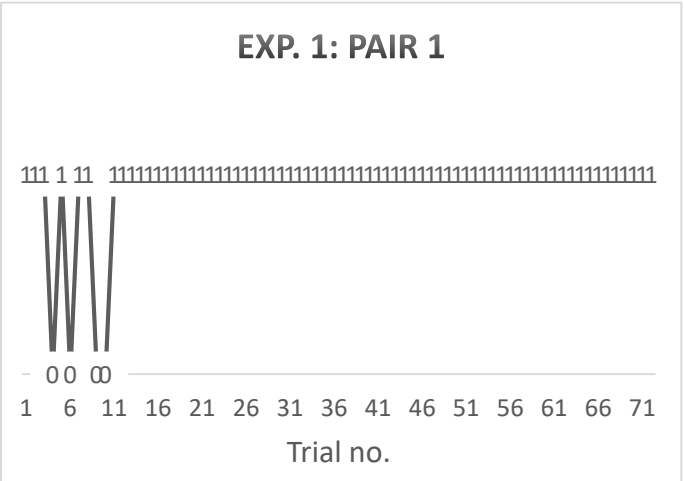

### EXP. 1: PAIR 2

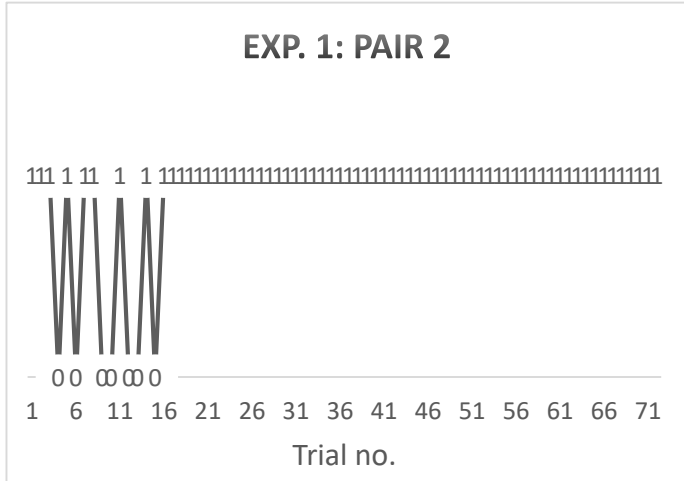

### EXP. 1: PAIR 3

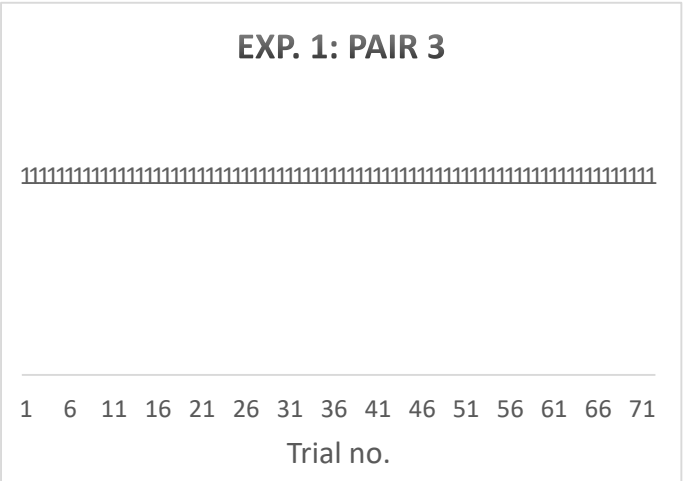

### EXP. 1: PAIR 4

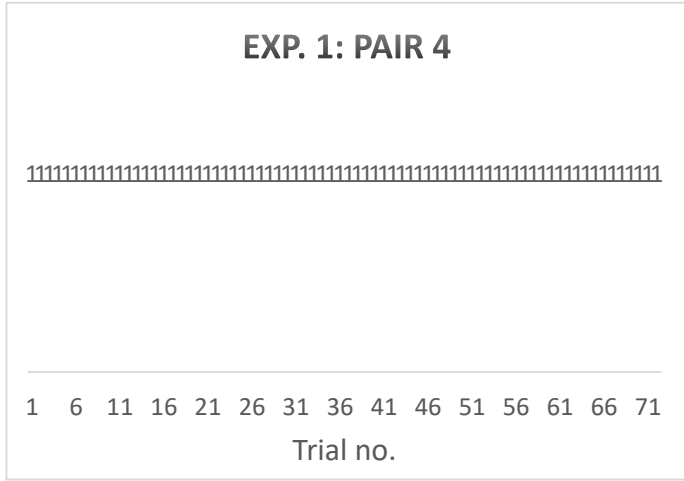

### EXP. 1: PAIR 5

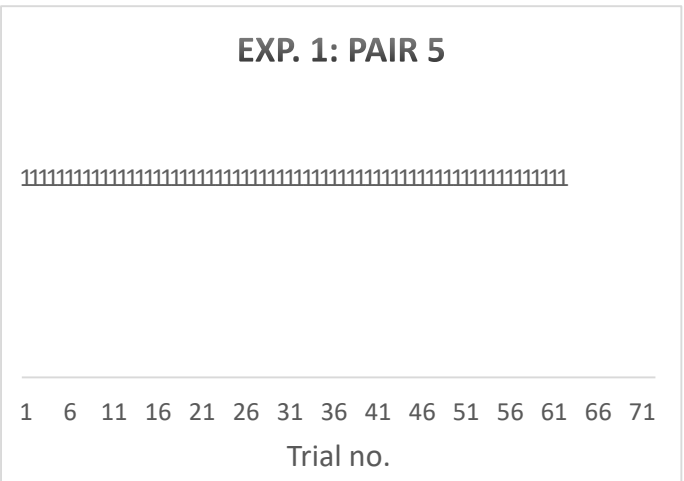

### EXP. 1: PAIR 6

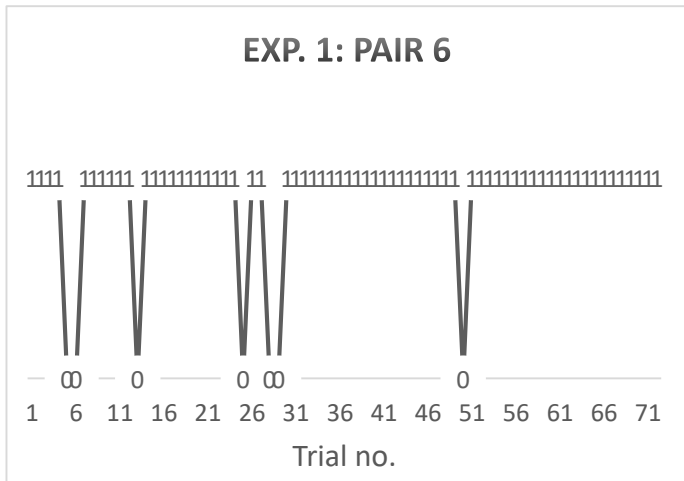

## Exp. 2: Trial-by-trial accuracy

Accuracy (1 = match, 0 = mismatch; y-axis) shown across trials (x-axis) per participant pair.

### EXP. 2: PAIR 1

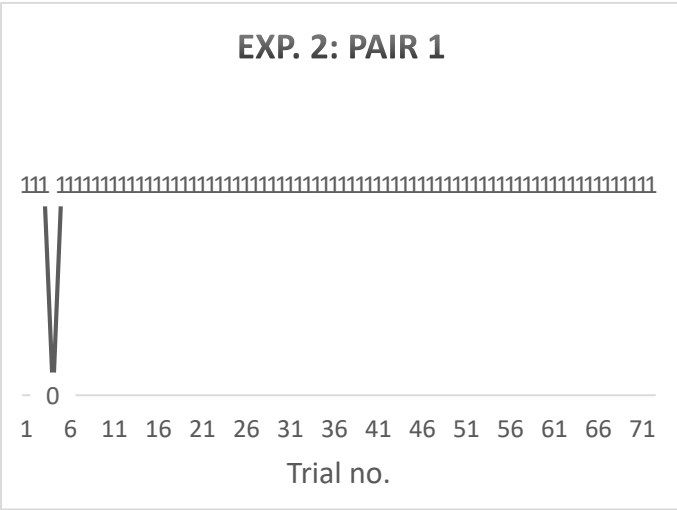

### EXP. 2: PAIR 2

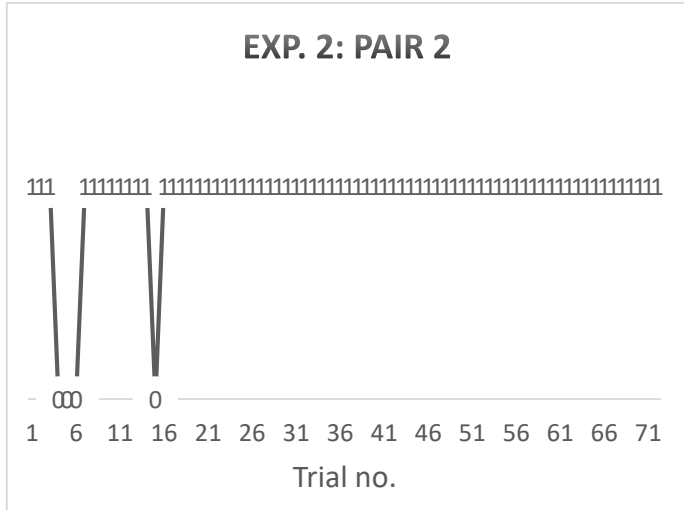

### EXP. 2: PAIR 3

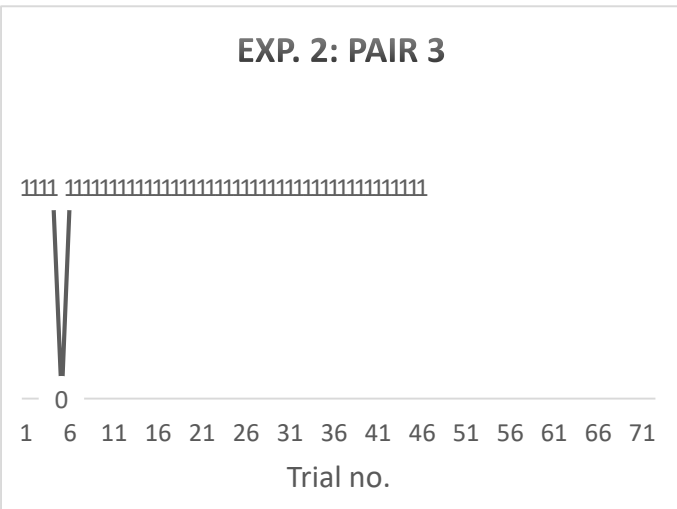

### EXP. 2: PAIR 4

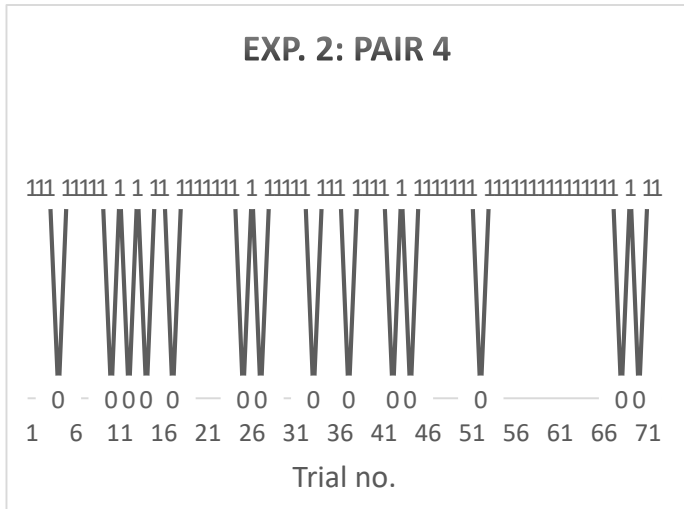

### EXP. 2: PAIR 5

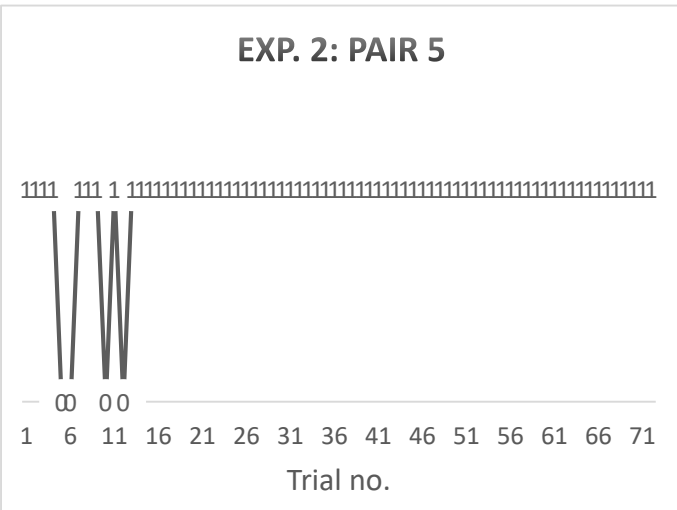

### EXP. 2: PAIR 6

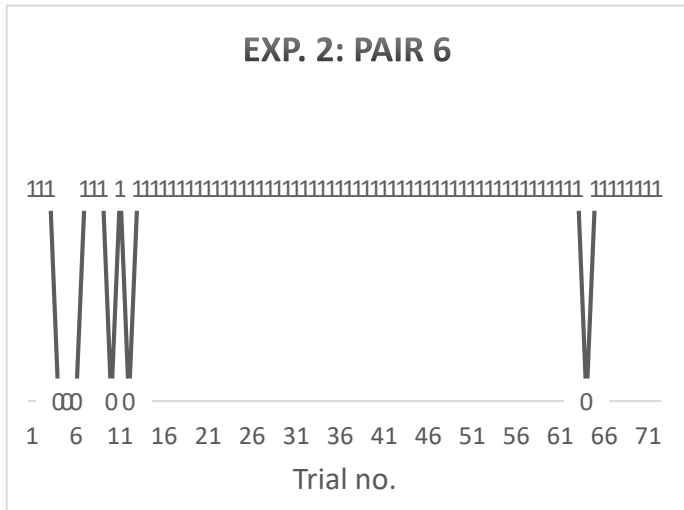

# Exp. 3: Trial-by-trial accuracy

Accuracy (1 = match, 0 = mismatch; y-axis) shown across trials (x-axis) per participant pair.

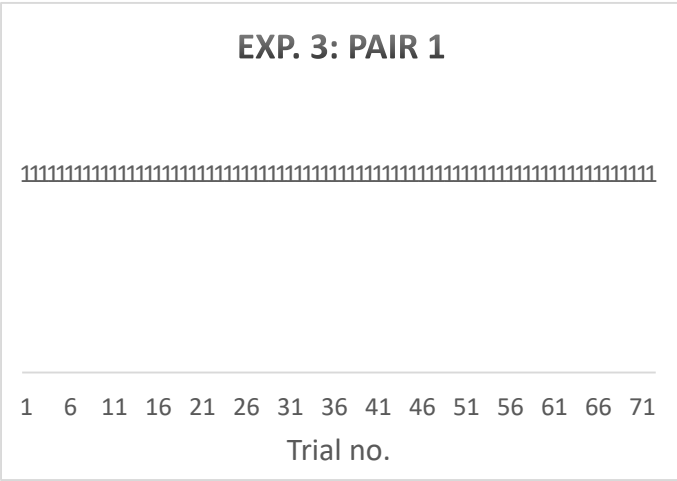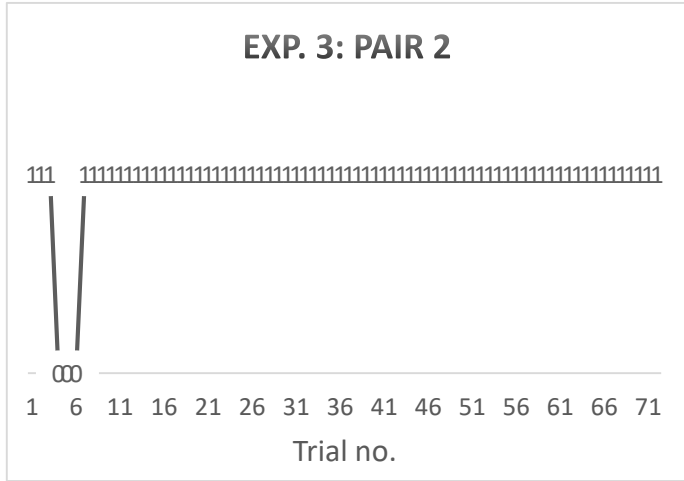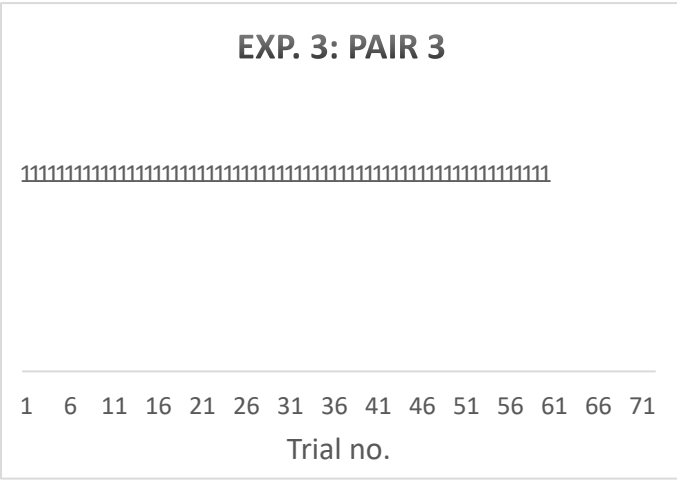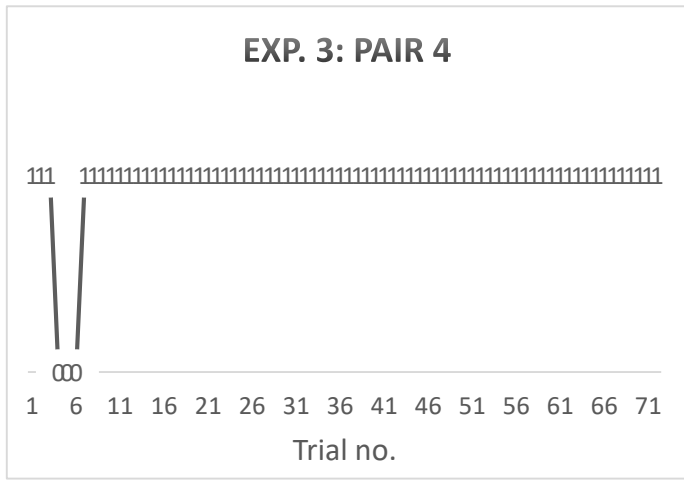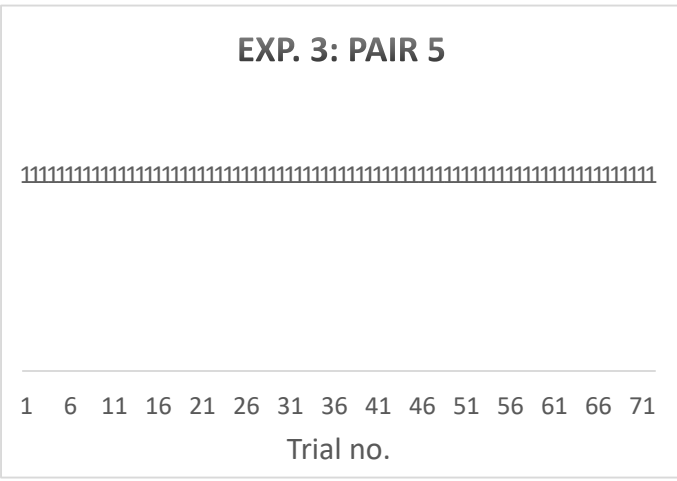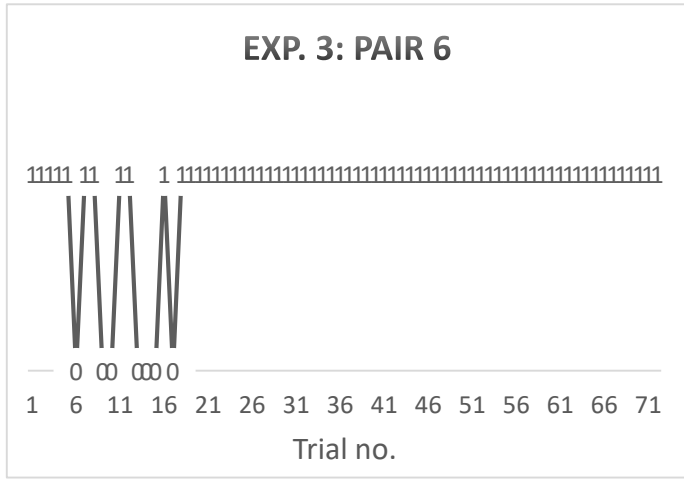

# Exp. 4: Trial-by-trial accuracy

Accuracy (1 = match, 0 = mismatch; y-axis) shown across trials (x-axis) per participant pair.

**EXP. 4: PAIR 1**

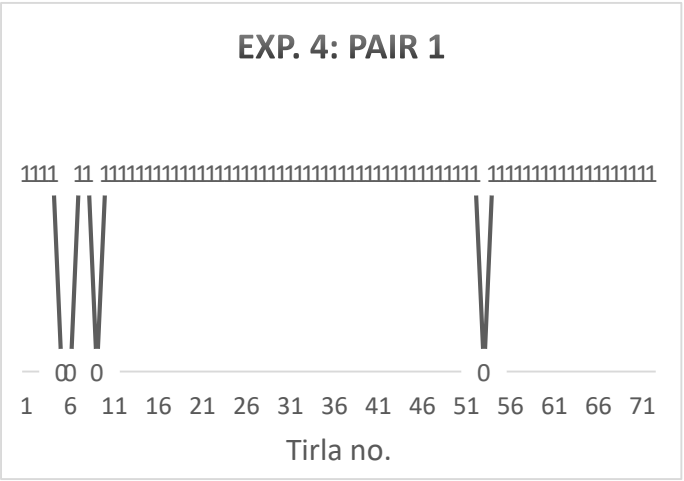

**EXP. 4: PAIR 2**

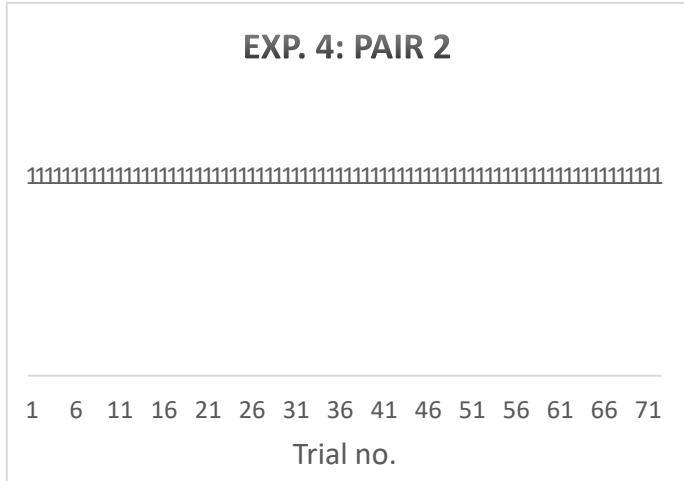

**EXP. 4: PAIR 3**

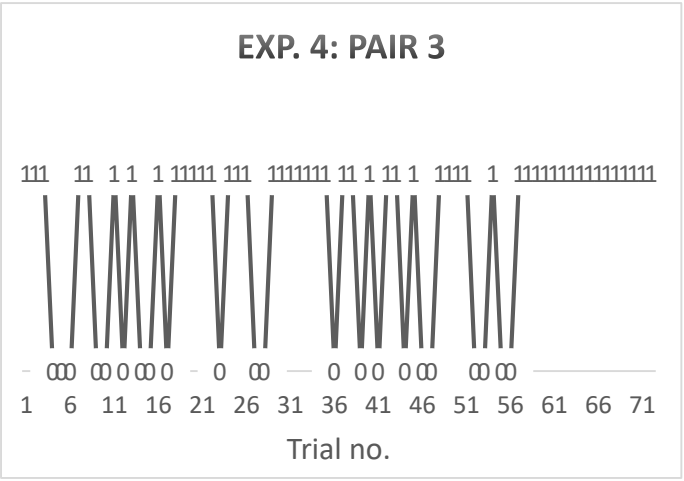

**EXP. 4: PAIR 4**

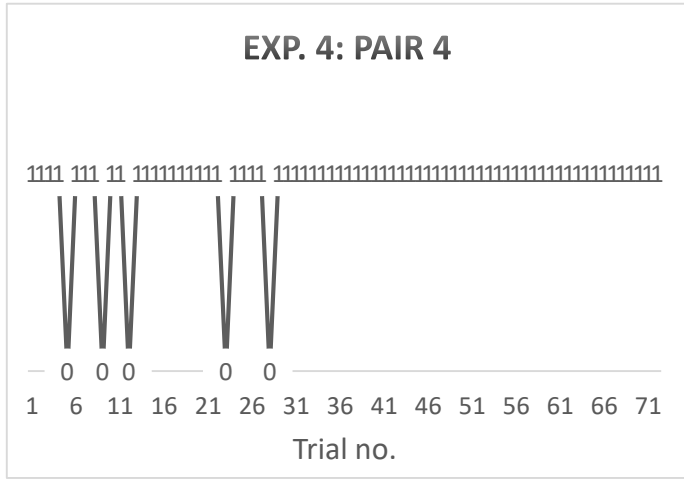

**EXP. 4: PAIR 5**

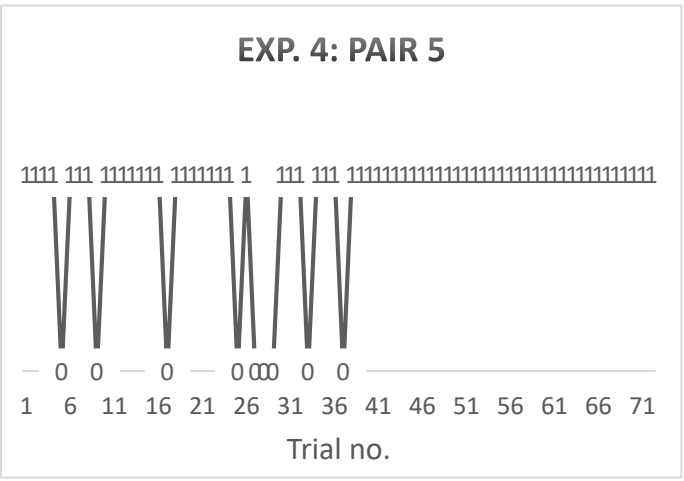

**EXP. 4: PAIR 6**

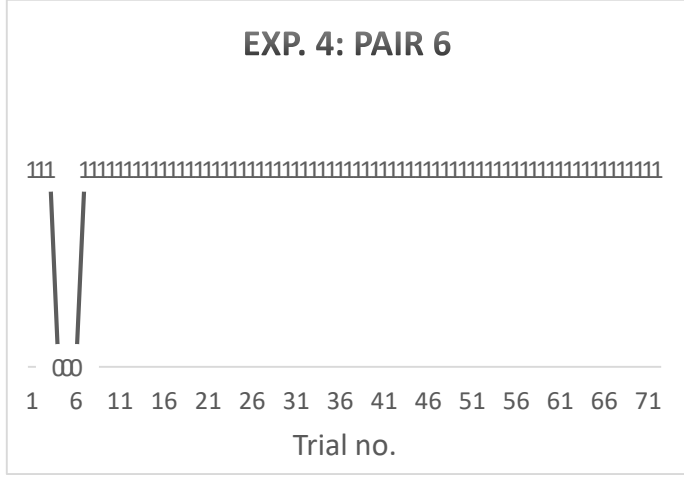

Supplement: COGS-42-2021-s002.pdf [file COGS-42-2021-s002.pdf]
